# Supplementary material for: The Schiff base of gossypol with 2-(aminomethyl)-15-crown-5 complexes with monovalent cations studied by MS,1H NMR, FT-IR and PM5 semiempirical methods
Source: Royal Society of Chemistry journal article supplement (doi:10.1039/b207834c), 2002-01-01
Supplement: figures.doc [file figures.doc]

## SUPPLEMENTARY DATA

**The Schiff’s** **base of gossypol with 2-(aminomethyl)-15-crown-5 complexes with monovalent cations studied by MS,**

**1H NMR, FT-IR and PM5 semiempirical methods**

**Piotr Przybylski, Grzegorz Schroeder, Bogumil Brzezinski***

Faculty of Chemistry, A. Mickiewicz University, Grunwaldzka 6, 60-780 Poznan, Poland

# Captions for figures

Figure 3. FT-IR spectra of the acetonitrile solutions of (______) the 1:2 complexes of GSCB with cations and (_ . _ . _) for comparison spectra of GSCB a) H+, b) Li+, c) Na+.

Figure 4. FT-IR spectra of (______) the 1:2 complexes of GSCB with cations and

(_ . _ . _) for comparison spectra of GSCB a) K+ (spectra in acetonitrile), b) Rb+ (spectra in chloroform), c) Cs+ (spectra in acetonitrile).

Figure 5. FT-IR spectra spectra with the extended scale of (______) the 1:2 complexes of GSCB with cations and (_ . _ . _) for comparison spectra of GSCB a) H+ (spectra in acetonitrile), b), Na+ (spectra in acetonitrile). c) Rb+ (spectra in chloroform)

# Figure 3

a

b

#

c

# Figure 4

a

b

c

### Figure 5

a

b

c

Schemes 3 an 4 in colour

Scheme 3


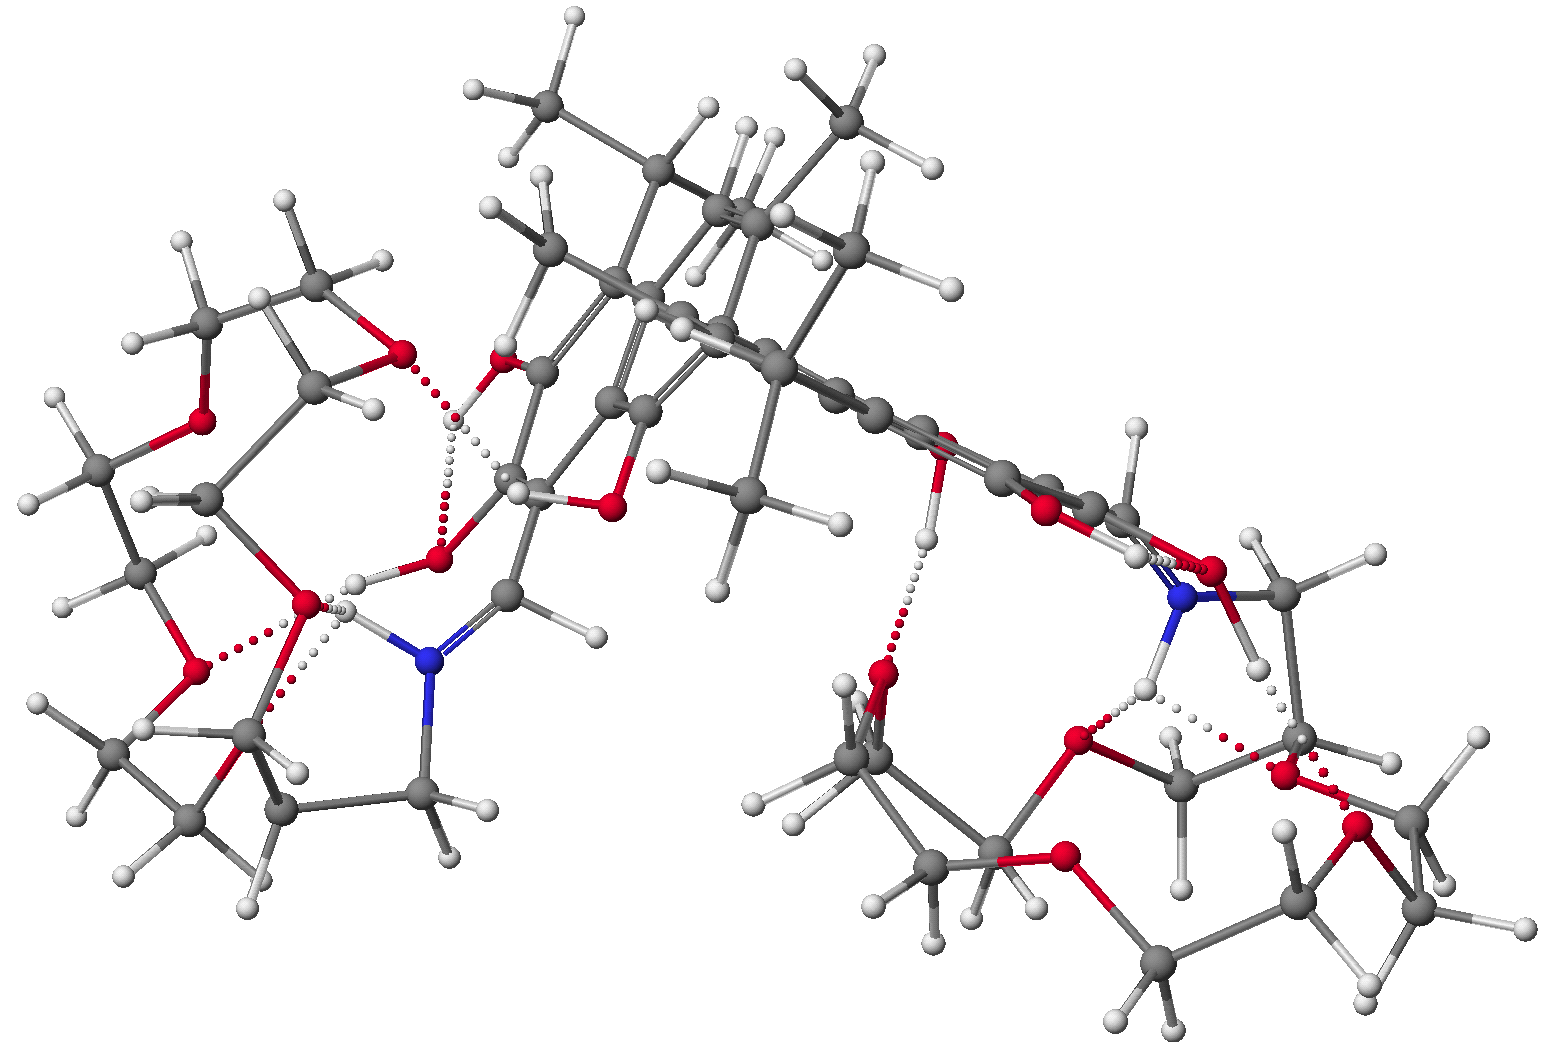


a

b


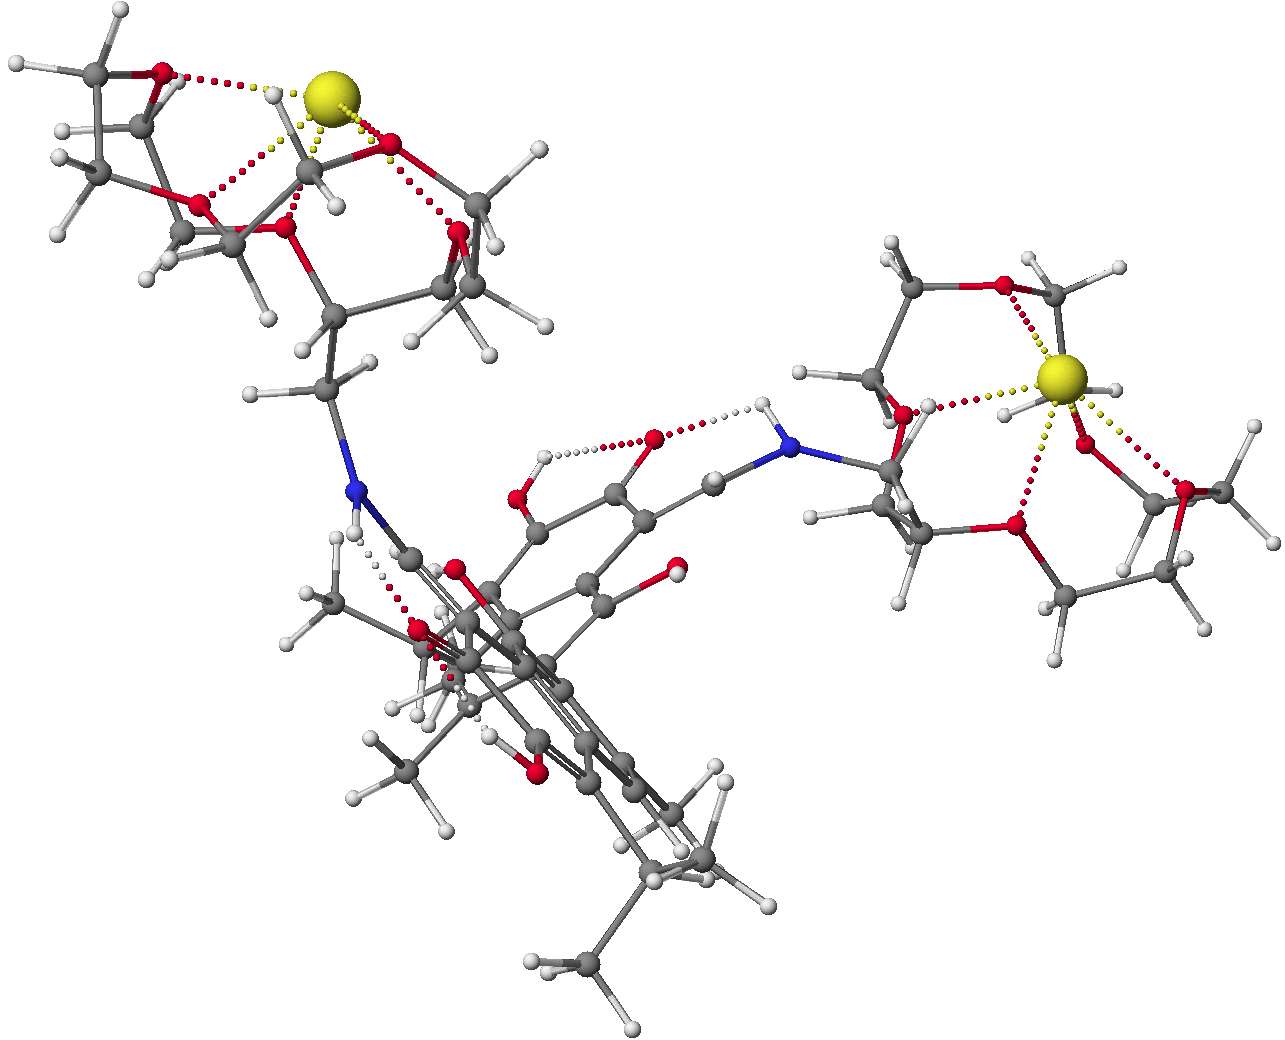


Scheme 4


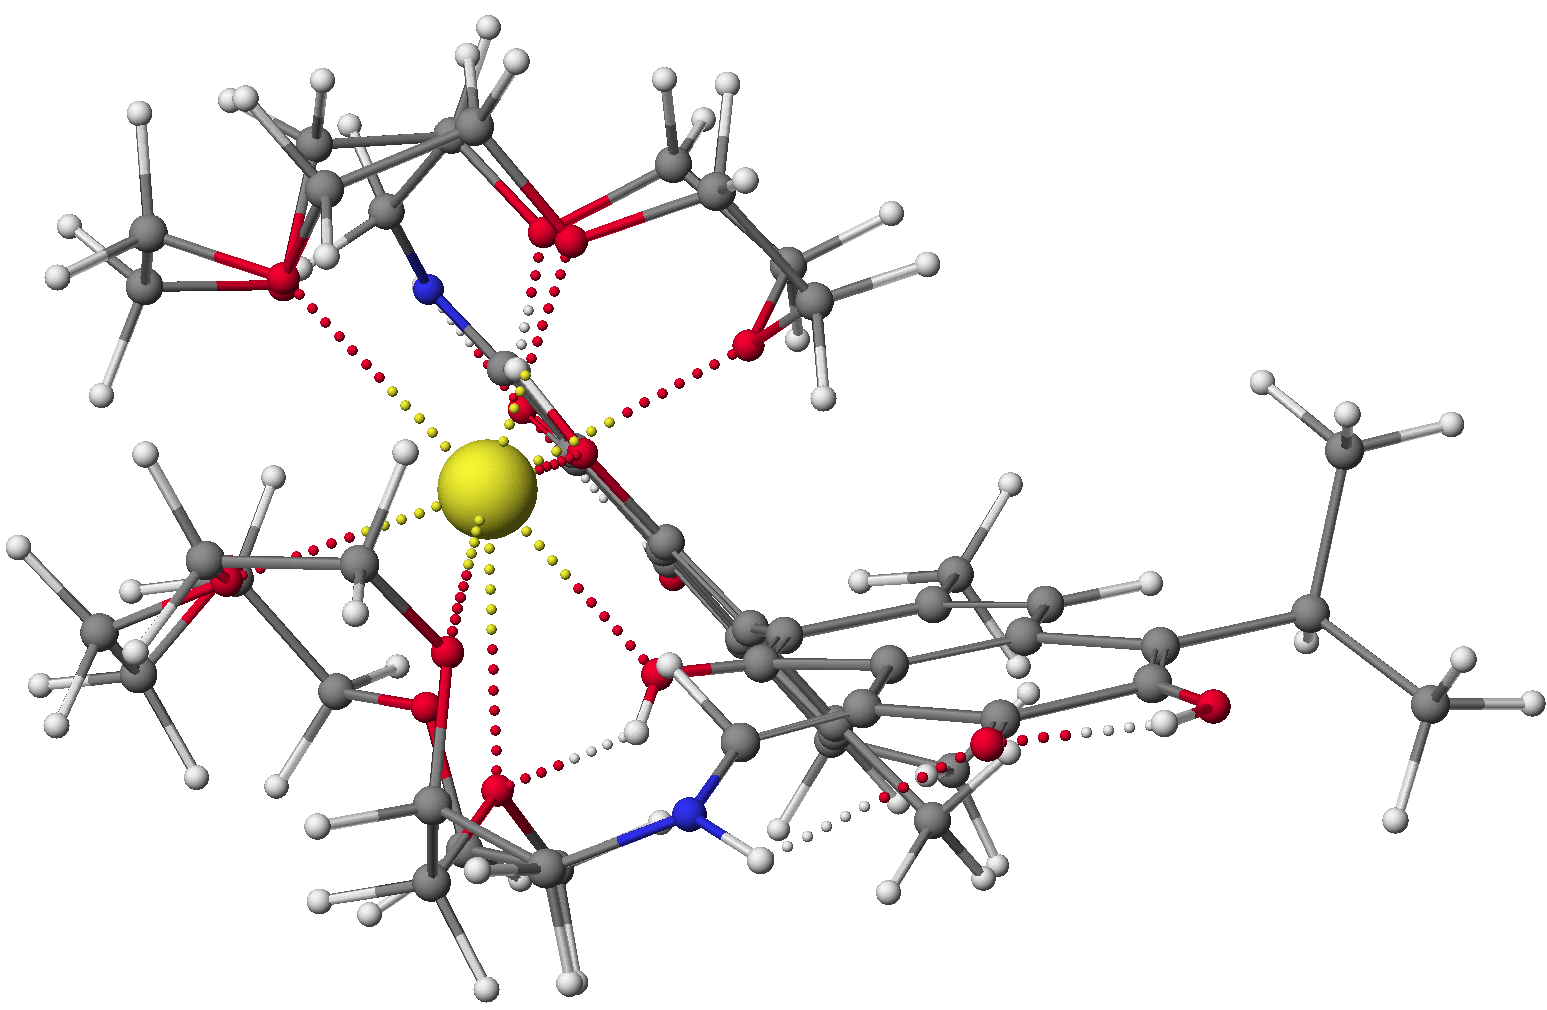


a0 )


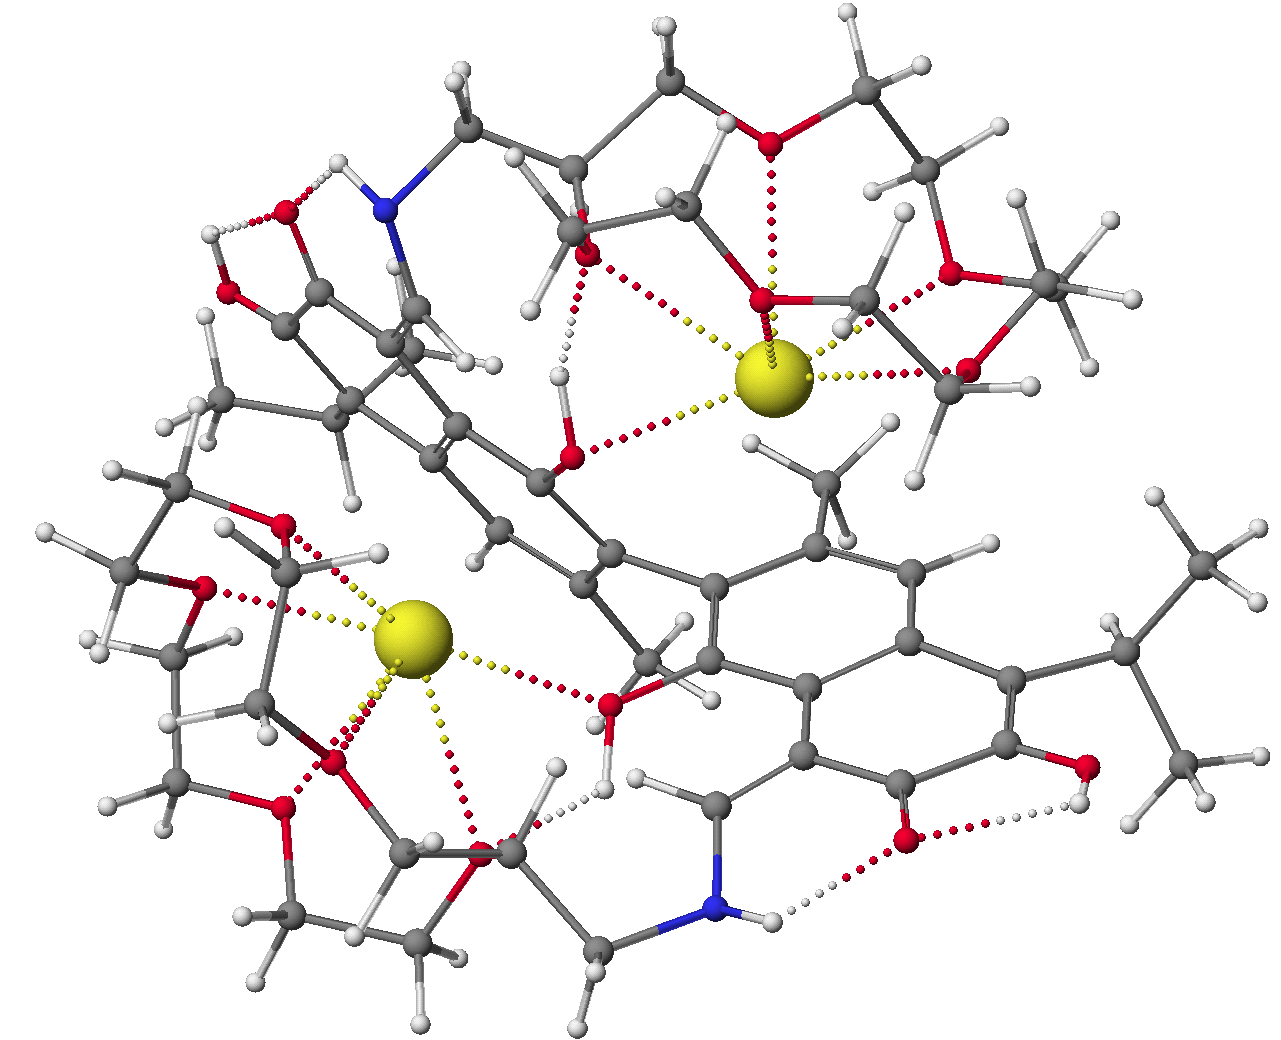


b
